# Supplementary material for: Parent skills training for parents of children or adults with developmental disorders: systematic review and meta-analysis protocol
Source: HighWire-hosted journal article supplement (doi:10.1136/bmjopen-2014-005799), 2014-08-01
Supplement: bmjopen-2014-005799supp.pdf [file bmjopen-2014-005799supp.pdf]

## **Appendix A: Search strategies used**

### Sample Search Strategy for Cumulative Index for Nursing and Allied Health (CINAHL)

1. (MH “child development disorders, pervasive+”)
2. (MH “Mental Retardation+”)
3. TX rett\*
4. TX autism\*
5. TX Asperger\*
6. TX pervasive development\* disorder\*
7. TX PDD OR PDDs
8. TX developmental delay\*
9. TX developmental disorder\*
10. TX developmental disability
11. TX developmental disabilities
12. TX developmental difference\*
13. TX down\* syndrome
14. TX fragile X
15. TX mental retard\*
16. TX intellectual disorder\*
17. TX intellectual disability
18. TX intellectual disabilities
19. 1 or 2 or 3 or 4 or 5 or 6 or 7 or 8 or 9 or 10 or 11 or 12 or 13 or 14 or 15 or 16 or 17 or 18
20. (MH “Family+”)

21. (MH "Parents+")
22. TX parent\* or family or families or mother\* or father\* or maternal\* or paternal\*
23. TX at home or home based or home-based
24. (MH "Caregivers")
25. TX carer\* or care-giver\* or caregiver\*
26. 20 or 21 or 22 or 23 or 24 or 25
27. 19 and 26
28. (MH "Treatment Outcomes+")
29. TX educat\* or train\* or program\* or therap\* or intervention\* or treatment\*
30. 28 or 29
31. 27 and 30
32. (MH "Qualitative Studies+")
33. 31 not 32
34. (MH "Research+")
35. 33 and 34
36. 35 (Limiters – Exclude MEDLINE records)

Search strategy for Cochrane Central Register of Controlled Trials (CENTRAL)

1. autis\*
2. pervasive development\* disorder\*
3. PDD
4. intellectual disability
5. intellectual disabilities
6. intellectual disorder\*

7. mental retardation
8. developmental disability
9. developmental disabilities
10. developmental disorder\*
11. 1 or 2 or 3 or 4 or 5 or 6 or 7 or 8 or 9 or 10

#### Sample Search Strategy for MEDLINE

1. exp child development disorders, pervasive/
2. exp Intellectual Disability/
3. developmental disabilities/
4. rett\*.tw.
5. autis\*.tw.
6. asperger\*.tw
7. (pervasive development\* disorder\* or PDD or PDDs).tw.
8. (developmental adj delay\*).tw.
9. (developmental adj disorder\*).tw.
10. (developmental adj disability).tw.
11. (developmental adj disabilities).tw.
12. (developmental adj differen\*).tw.
13. ((down\* adj syndrome) or (fragile adj X)).tw.
14. (mental adj retard\*).tw.
15. (intellectual adj disorder\*).tw.
16. (intellectual adj disability).tw.
17. (intellectual adj disabilities).tw.

18. 1 or 2 or 3 or 4 or 5 or 6 or 7 or 8 or 9 or 10 or 11 or 12 or 13 or 14 or 15 or 16 or 17

19. Family/

20. exp Parents/

21. (parent\* or family or families or mother\* or father\* or maternal\* or paternal\*).tw.

22. (at home or (in adj3 home) or home based or home-based).tw.

23. Caregivers/

24. (carer\* or care-giver\* or caregiver\*).tw.

25. 19 or 20 or 21 or 22 or 23 or 24

26. 18 and 25

27. exp treatment outcome/

28. (educat\* or train\* or program\* or therap\* or intervention\* or treatment\*).tw.

29. 27 or 28

30. 26 and 29

31. qualitative.mp.

32. 30 not 31

33. exp Epidemiologic Methods/

34. 32 and 33

#### Search Strategy for PsycINFO and Education Resource Information Center

1. developmental disabilities/

2. rett\*.tw.

3. autis\*.tw.

4. asperger\*.tw

5. (pervasive development\* disorder\* or PDD or PDDs).tw.

6. (developmental adj delay\*).tw.
7. (developmental adj disorder\*).tw.
8. (developmental adj disability).tw.
9. (developmental adj disabilities).tw.
10. (developmental adj differen\*).tw.
11. ((down\* adj syndrome) or (fragile adj X)).tw.
12. (mental adj retard\*).tw.
13. (intellectual adj disorder\*).tw.
14. (intellectual adj disability).tw.
15. (intellectual adj disabilities).tw.
16. 1 or 2 or 3 or 4 or 5 or 6 or 7 or 8 or 9 or 10 or 11 or 12 or 13 or 14 or 15
17. Family/
18. exp Parents/
19. (parent\* or family or families or mother\* or father\* or maternal\* or paternal\*).tw.
20. (at home or (in adj3 home) or home based or home-based).tw.
21. Caregivers/
22. (carer\* or care-giver\* or caregiver\*).tw.
23. 17 or 18 or 19 or 20 or 21 or 22
24. 16 and 23
25. exp treatment outcome/
26. (educat\* or train\* or program\* or therap\* or intervention\* or treatment\*).tw.
27. 25 or 26
28. 24 and 27

29. qualitative.mp.

30. 28 not 29

31. limit 30 to (“1800 quantitative study”)

Sample search strategy for African Index Medicus (AIM) and Afro Library (AFROLIB)

1. autism

2. autistic

3. autism spectrum disorder

4. ASD

5. Asperger’s

6. pervasive developmental disorder

7. PDD

8. intellectual disability

9. developmental disability

10. developmental disorder

11. mental retardation

12. autistique

13. troubles du spectre autistique

14. troubles envahissants du developpement

15. deficiencia intelectual

16. troubles du developpement

17. retard mental

18. 1 or 2 or 3 or 4 or 5 or 6 or 7 or 8 or 9 or 10 or 11 or 12 or 13 or 14 or 15 or 16 or 17

Search strategy for Literatura Latino Americana em Ciências da Saúde (LILACS):

1. autism
2. autistic
3. autism spectrum disorder
4. ASD
5. Asperger's
6. pervasive developmental disorder
7. PDD
8. intellectual disability
9. developmental disability
10. developmental disorder
11. mental retardation
12. autismo
13. autista
14. trastorno del desarrollo
15. discapacidad intelectual
16. discapacidad del desarrollo
17. retraso mental

Index Medicus for the Western Pacific (WPRIM)

1. autism
2. autistic
3. autism spectrum disorder
4. ASD
5. Asperger's

6. pervasive developmental disorder
7. PDD
8. intellectual disability
9. developmental disability
10. developmental disorder
11. mental retardation
12. autistique
13. troubles du spectre autistique
14. troubles envahissants du developpement
15. deficiance intellectuelle
16. troubles du developpement
17. retard mental
18. 1 or 2 or 3 or 4 or 5 or 6 or 7 or 8 or 9 or 10 or 11 or 12 or 13 or 14 or 15 or 16 or 17
19. education OR educate OR l'éducation OR éduquer
20. train OR training OR former OR formation
21. program OR d'un programme
22. therapy OR traitement OR therapie cognitive
23. treatment OR traitement
24. intervention OR entremise
25. 19 or 20 or 21 or 22 or 23 or 24
26. 18 and 25
